# Supplementary material for: The Effect of Baby Schema in Cats on Length of Stay in an Irish Animal Shelter
Source: MDPI journal article supplement (doi:10.3390/ani12111461), 2022-06-04
Supplement: s1 [file s1]

## Supplementary Material

**Table S1.** Demographic details of participants that took part in the subjective cuteness rating in survey 1 (n = 341) and survey 2 (n = 574)

| Demographic Information | Percentage |          |
|-------------------------|------------|----------|
|                         | Survey 1   | Survey 2 |
| <b>Gender</b>           |            |          |
| Male                    | 15.8       | 22       |
| Female                  | 82.1       | 73.9     |
| Self-Identify           | 2.1        | 4.2      |
| <b>Age</b>              |            |          |
| 18-24                   | 8.8        | 5.4      |
| 25-39                   | 60.1       | 54       |
| 40-59                   | 28.2       | 34.7     |
| 60+                     | 2.9        | 5.9      |

**Table S2.** Days to adoption for cats in shelter separated by sex for both surveys.

|                 |     |     |     |      |        |          |
|-----------------|-----|-----|-----|------|--------|----------|
| <b>Survey 1</b> |     |     |     |      |        |          |
|                 | N   | Min | Max | Mean | Median | Std. Dev |
| Male            | 23  | 18  | 475 | 104  | 71     | 125.37   |
| Female          | 54  | 15  | 453 | 108  | 78.50  | 85.10    |
| <b>Survey 2</b> |     |     |     |      |        |          |
| Male            | 58  | 13  | 505 | 87   | 51     | 105.36   |
| Female          | 107 | 1   | 453 | 100  | 73     | 87.192   |

**Table S3.** Details of LoS for cats in survey 1, with a breakdown for adoption profiles and homing requirements.

|                           | Average LoS | Min | Max | N  |
|---------------------------|-------------|-----|-----|----|
| <b>Adoption Profile</b>   |             |     |     |    |
| Positive                  | 100         | 15  | 475 | 47 |
| Negative                  | 118         | 28  | 475 | 30 |
| <b>Homing requirement</b> |             |     |     |    |
| Single                    | 101         | 15  | 453 | 56 |
| Paired                    | 125         | 21  | 475 | 21 |
